# Supplementary material for: Silica Exposure Differentially Modulates Autoimmunity in Lupus Strains and Autoantibody Transgenic Mice
Source: PubMed Central journal article supplement (PMC6781616; doi:10.3389/fimmu.2019.02336), 2019-10-01
Supplement: Image_1.pdf [file Image_1.pdf]

**Figure S.1.**

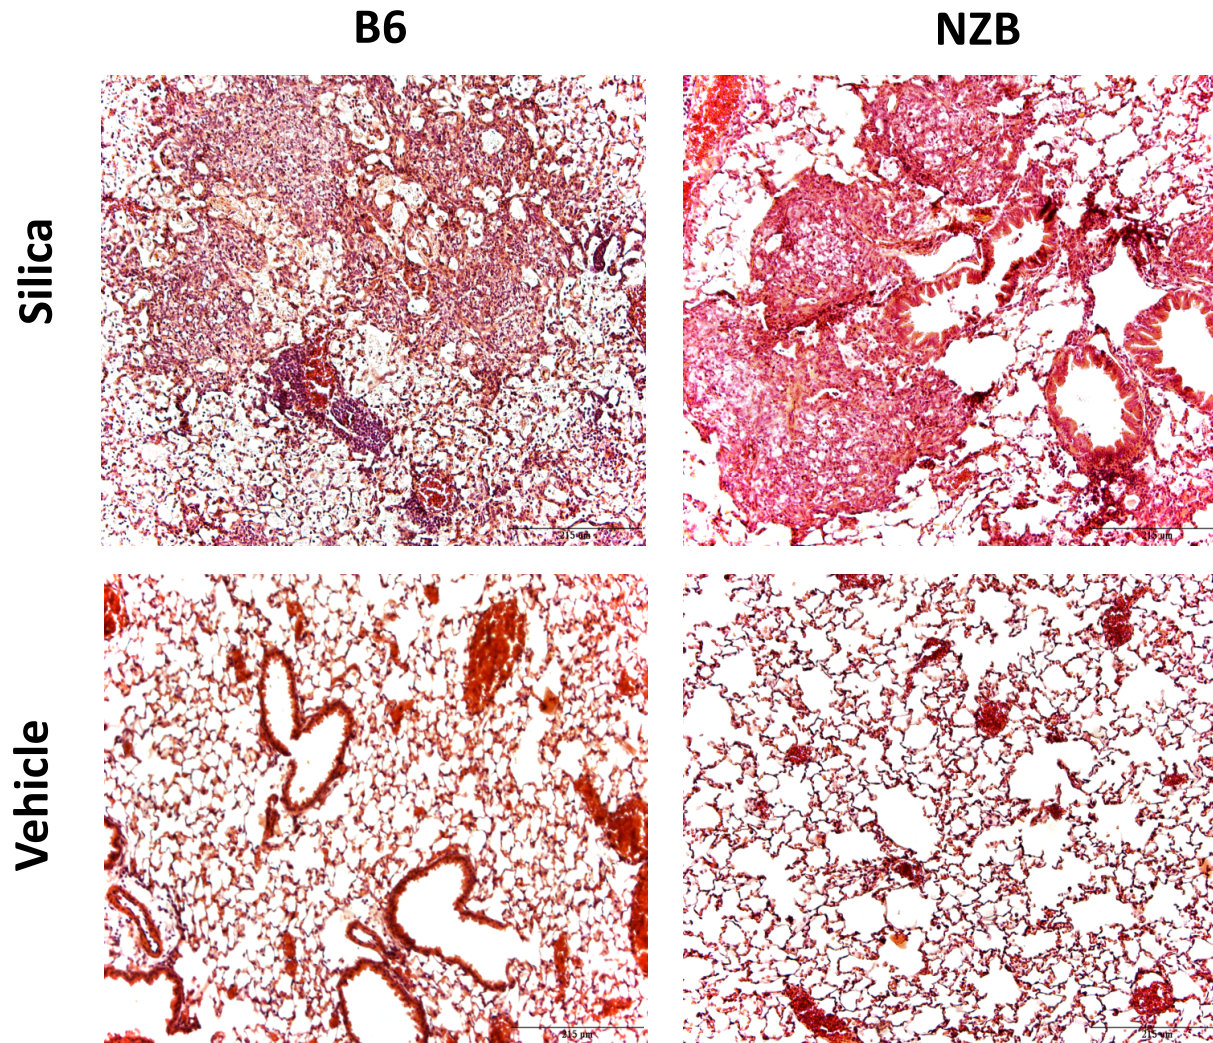

Lung injury and inflammation from mice one month after exposure.

Representative sections from mice of indicated strain; H&E, original magnification x40.
