# Supplementary material for: Silica Exposure Differentially Modulates Autoimmunity in Lupus Strains and Autoantibody Transgenic Mice
Source: PubMed Central journal article supplement (PMC6781616; doi:10.3389/fimmu.2019.02336), 2019-10-01
Supplement: Image_3.pdf [file Image_3.pdf]

## Spleen

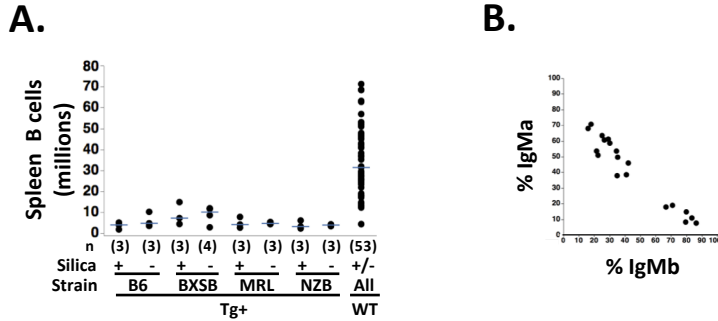

(A) Spleen CD19<sup>+</sup> B cell numbers as determined by flow cytometric analysis in silica- or vehicle-exposed autoAb Tg mice. Strains are indicated; for comparison to B cell numbers in wildtype (non-autoAb Tg) mice, spleen B cell counts from wildtype mice described in this paper are pooled (All, n=53). Each symbol represents an individual mouse; the median for each group is indicated by the bar. (B) Relative expression of autoAb Tg IgMa versus endogenous IgMb on splenic B cells, as determined by flow cytometry, for B6, BXSb and NZB autoAb Tg mice. The 6 B6 subjects are represented in the cluster of symbols with low % IgMa and high % IgMb in the lower right section of graph. Each symbol represents an individual mouse. (MRL mice express endogenous IgMj allotype that crossreacts with IgMa; samples from MRL autoAb Tg subjects are not included in this assay.)

**Fig. S.3**
