# Supplementary material for: Silica Exposure Differentially Modulates Autoimmunity in Lupus Strains and Autoantibody Transgenic Mice
Source: PubMed Central journal article supplement (PMC6781616; doi:10.3389/fimmu.2019.02336), 2019-10-01
Supplement: Table_1.pdf [file Table_1.pdf]

**Table S.1. Exposure duration and age at harvest for autoAb Tg mice.**

| Strain  | Exposure | Time<br>post-exposure<br>at harvest (wks) | Age at harvest (wks)   |
|---------|----------|-------------------------------------------|------------------------|
| B6-Tg   | Si       | 7.3                                       | 48.4, 78, 78.3         |
|         | V        | 7.3                                       | 43, 48.4, 78.3         |
| BXSB-Tg | Si       | 7.3                                       | 46.4, 51.7, 51.7       |
|         | V        | 7.3                                       | 46.4, 50.9, 51.7, 51.7 |
| MRL-Tg  | Si       | 6.3                                       | 25.4, 49.1, 56.9       |
|         | V        | 6.3                                       | 25.4, 49.1, 56.9       |
| NZB-Tg  | Si       | 3.4 <sup>a</sup>                          | 27.6, 34.6, 45.6       |
|         | V        | 3.4                                       | 27.6, 35.1, 35.1       |

a. NZB-Tg mice were harvested early after weight loss and death occurred in 3 exposed NZB-Tg mice (not included in these analyses).
